# Supplementary material
Source: ML conference proceedings conference paper supplement (https://openaccess.thecvf.com/content/WACV2025/html/Arshad_Leveraging_Vision_Language_WACV_2025_paper.html)
Supplement: Supplementary file 1 [file Arshad_Leveraging_Vision_Language_WACV_2025_supplemental.pdf]

## S1. Supplementary Material

This section provides additional details about the datasets used in this study, including their names, links, and the classes they contain.

### S1.1. Prompts

For identification tasks, we used a universal prompt template, which was provided in the prompt engineering section, asking models to identify the class from a given list and provide the answer in JSON format. For classification and quantification tasks, we employed specialized prompts tailored to each dataset’s requirements. These prompts included specific instructions on rating scales or counting methods relevant to the task at hand.

*IDC Dataset:*

```
Analyze this image of a soybean canopy to determine
↳ the iron deficiency chlorosis (IDC) severity
↳ rating. The images are of soybean plants
↳ exhibiting various levels of IDC symptoms,
↳ ranging from healthy green plants to those with
↳ severe chlorosis and necrosis. Evaluate the
↳ extent of yellowing and browning in the canopy.
↳ Provide your answer in the following JSON format:
{"prediction": "number"}
Replace "number" with your best estimate of the IDC
↳ severity rating based on your analysis of the
↳ image.
The number should be entered exactly as a whole
↳ number (without any symbols) in a range of
↳ {expected_classes}. Higher value means more
↳ severity.
The response should start with { and contain only a
↳ JSON object (as specified above) and no other
↳ text.
```

*Insect Count:*

```
Analyze this image of a yellow sticky insect trap.
↳ Count the total number of visible insects caught
↳ on the trap. Only look for insects which are
↳ easily visible to naked eye and look bigger
↳ compared to the other background artifacts.
↳ Provide your answer in the following JSON format:
{"prediction": "number"}
Replace "number" with your best estimate of the
↳ total insect count based on your analysis of the
↳ image. The number should be entered exactly as a
↳ whole number (without any symbols) in a range of
↳ {expected_classes} The response should start
↳ with { and contain only a JSON object (as
↳ specified above) and no other text.
```

*PlantDoc (Disease Quantification)*

```
Analyze this image of a leaf to get the total
↳ percentage of affected leaf. The images are of
↳ several plant leaf-like Apple Scab Leaf, Apple
↳ rust leaf, Bell_pepper leaf spot, Corn leaf
↳ blight, Potato leaf early blight, etc. The
↳ affected area is: diseased leaf area / total
↳ image area. Provide your answer in the following
↳ JSON format:
{"prediction": "number"}
Replace "number" with your best estimate of the
↳ percent on your analysis of the image. The
↳ number should be entered exactly as a whole
↳ number (without any symbols) in a range of
↳ {expected_classes} The response should start
↳ with { and contain only a JSON object (as
↳ specified above) and no other text.
```

### S1.2. Additional dataset details

Table S1 provides a comprehensive overview of the datasets used in the AgEval benchmark. It categorizes each dataset based on its primary task (Identification, Classification, or Quantification) and subcategory (e.g., Seed Morphology, Foliar Stress, Pests). The table includes key information such as the number of images, classes, year of creation, geographical location, and the evaluation metric used. This diverse collection of datasets covers various aspects of plant stress phenotyping, ranging from seed quality assessment to disease severity classification across different crops and regions. Table S2 provides a comparison of the performance of traditional models on these datasets.

Figure S1 provides a treemap visualization of the AgEval benchmark datasets, illustrating the distribution and hierarchy of tasks, subcategories, and individual classes. This comprehensive view highlights the diverse range of plant stress-related challenges addressed by AgEval, for all the AgEval benchmark. The size of each rectangle corresponds to the number of instances in that class, offering insights into the dataset composition and balance. We sampled 100 images in total from each dataset and the size corresponds to the resulting number of instances per class in each dataset used to build AgEval.

### S1.3. Additional details on intra-task uniformity

Figure S2 provides a detailed examination of intra-task uniformity across different datasets in the AgEval benchmark. Each subfigure represents a specific dataset, showcasing the F1 scores for the highest, median, and lowest performing classes based on 0-shot performance. The visualization for each class displays both the 0-shot F1 score (solid bars) and the additional gain in F1 score achieved with 8-shot learning (hatched bars) for all six evaluated models. This comprehensive view highlights the significant performance disparities among classes within each task, supporting our finding that the coefficient of variance

**Table S1.** Classification of Agricultural Image Datasets. Categories: I (Identification), C (Classification), Q (Quantification)

| Dataset                     | Category | Subcategory      | Description                             | # of Classes | Year      | Location      | Metric |
|-----------------------------|----------|------------------|-----------------------------------------|--------------|-----------|---------------|--------|
| Durum Wheat [16, 41]        | I        | Seed Morphology  | Wheat variety identification            | 3            | 2019      | Turkey        | F1     |
| Soybean Seeds [17]          | I        | Seed Morphology  | Soybean quality prediction              | 5            | N/A       | N/A           | F1     |
| Mango Leaf Disease [18, 19] | I        | Foliar Stress    | Mango leaf disease classification       | 8            | 2022      | Bangladesh    | F1     |
| Bean Leaf Lesions [20]      | I        | Foliar Stress    | Bean leaf lesion type classification    | 3            | N/A       | N/A           | F1     |
| Soybean Diseases [21]       | I        | Foliar Stress    | Soybean stress identification           | 9            | 2016      | United States | F1     |
| Dangerous Insects [23]      | I        | Pests            | Harmful insects identification          | 15           | N/A       | N/A           | F1     |
| DeepWeeds [22, 42]          | I        | Pests            | Weeds species identification            | 9            | 2019      | Australia     | F1     |
| Yellow Rust 19 [25–27]      | C        | Disease Severity | Wheat yellow rust severity              | 6            | 2021      | Turkey        | NMAE   |
| FUSARIUM 22 [28–30]         | C        | Disease Severity | Chickpea fusarium wilt severity         | 5            | 2023      | Turkey        | NMAE   |
| IDC [31]                    | C        | Stress Tolerance | Soybean stress severity                 | 5            | 2015      | United States | NMAE   |
| InsectCount [32]            | Q        | Pest Count       | Insect count in images                  | -            | 2021-2022 | N/A           | NMAE   |
| PlantDoc [33, 34]           | Q        | Disease          | Percentage of the leaf that is diseased | -            | N/A       | N/A           | NMAE   |

**Table S2.** Performance of the Traditional Models on Agricultural Image Datasets

| Dataset                     | Method/Approach Used                  | Reported Metric (Score)                       | Train                 | Validation | Test       |
|-----------------------------|---------------------------------------|-----------------------------------------------|-----------------------|------------|------------|
| Durum Wheat [16, 41]        | Transfer learning with EfficientNetB3 | F1 Score (100)                                | 227(70%)              | 49 (15%)   | 49 (15%)   |
| Soybean Seeds [17]          | Transfer learning with ResNet50       | Accuracy (89)                                 | 4410(80%)             | -          | 1103(20%)  |
| Mango Leaf Disease [18, 19] | Transfer learning with EfficientNetB3 | Accuracy (100)                                | 3200(80%)             | 480(12%)   | 320(8%)    |
| Bean Leaf Lesions [20]      | Hybrid Model (ViT, SVM)               | F1 score (91)                                 | 974 (84%)             | 133 (11%)  | 60 (5%)    |
| Soybean Diseases [21]       | Convolutional neural network          | Accuracy (94)                                 | 53266(81%)            | 5918(9%)   | 6576(10%)  |
| Dangerous Insects [23]      | Transfer learning with Xception       | Accuracy (77)                                 | 1272 (80%)            | 287 (18%)  | 32 (2%)    |
| DeepWeeds [22, 42]          | Transfer learning with ResNet26       | F1 score (91)                                 | 11205(64%)            | 2801(16%)  | 3501(20%)  |
| Yellow Rust 19 [25–27]      | CNN-CGLCM with SVM                    | Accuracy (92)                                 | 13500 (90%)           | -          | 1500 (10%) |
| FUSARIUM 22 [28–30]         | Hybrid Classifier (ViT,CatBoost)      | F1 score (75)                                 | 2950(68%)             | 521 (12%)  | 868(20%)   |
| IDC [31]                    | Hierarchical classification           | Accuracy (96)                                 | 1479(75%)             | -          | 493 (25%)  |
| InsectCount [32]            | Internal dataset                      |                                               | No baseline published |            |            |
| PlantDoc [33, 34]           |                                       | No baseline exists on this data for this task |                       |            |            |

(CV) ranges from 26.02% to 58.03% across models. The stark differences between the highest and lowest performing classes underscore the need for subject matter expertise to achieve reliable performance, especially for "difficult" classes.

#### S1.4. Anecdotal Samples from Each Task:

Two samples and their corresponding predictions with respect to 0 and 8 shot are provided later. Please note that the questions are for illustration and actual prompts provided are in [Section S1.1](#)

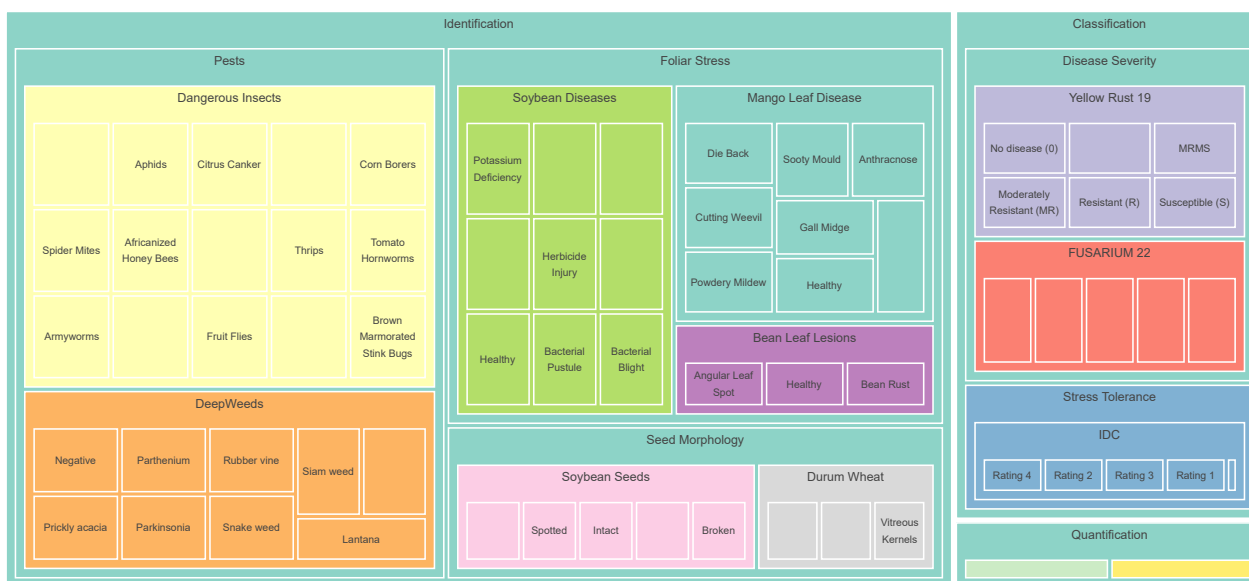

**Figure S1.** Visualization of AgEval Benchmark Dataset - This treemap illustrates the distribution of datasets used in AgEval for plant stress identification, classification, and quantification. It contains subcategories, dataset names, and specific class names. Each rectangle represents a unique class name, with its size proportional to the count of instances. The visualization demonstrates the diversity of plant stress-related tasks covered by the AgEval framework across various crops and conditions.

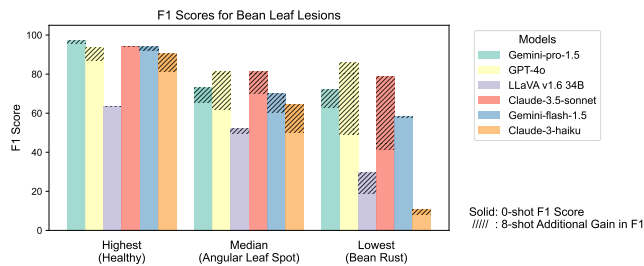

(a) Bean Leaf Lesions F1 Scores

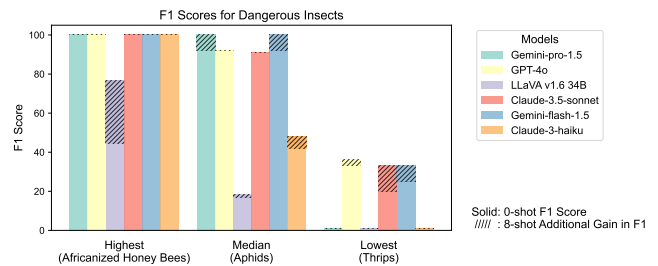

(b) Dangerous Insects F1 Scores

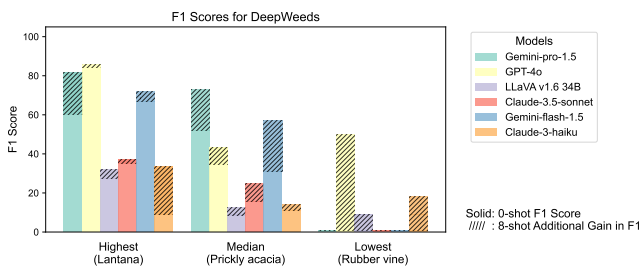

(c) DeepWeeds F1 Scores

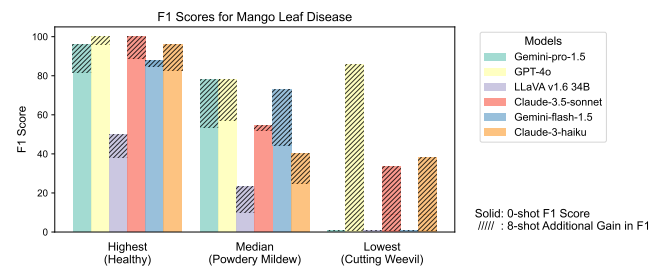

(d) Mango Leaf Disease F1 Scores

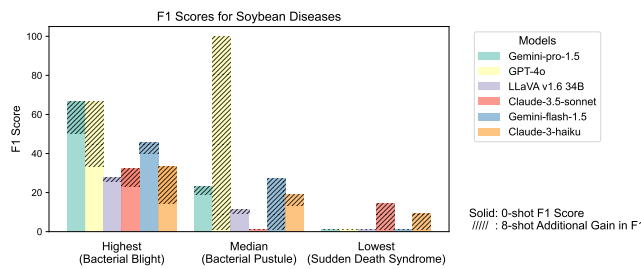

(e) Soybean Diseases F1 Scores

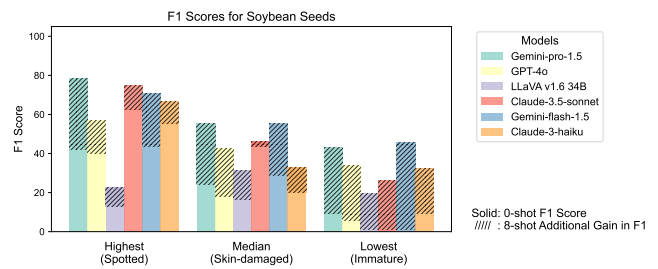

(f) Soybean Seeds F1 Scores

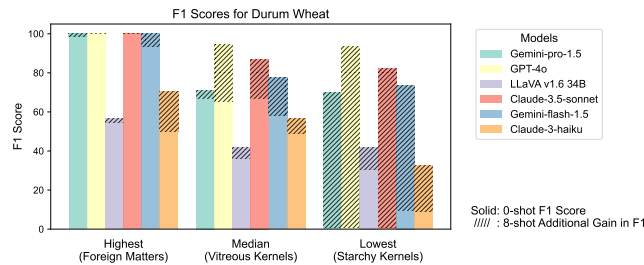

(g) Durum Wheat F1 Scores

Figure S2. Comparison of F1 Scores for classes within datasets for Highest, Medium and Lowest performing class.

What wheat variety is this?

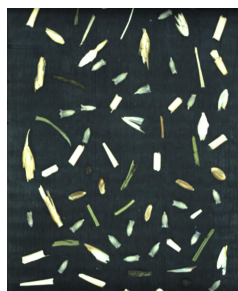

| Category           | Subcategory     | Task        |
|--------------------|-----------------|-------------|
| Identification (I) | Seed Morphology | Durum Wheat |

**Ground Truth:** Foreign Matters

**Predictions:**

| Model Name        | 0 shot           | 8 shot           |
|-------------------|------------------|------------------|
| Gemini-pro-1.5    | Foreign Matters  | Foreign Matters  |
| GPT-4o            | Foreign Matters  | Foreign Matters  |
| LLaVA v1.6 34B    | Starchy Kernels  | Vitreous Kernels |
| Claude-3.5-sonnet | Foreign Matters  | Foreign Matters  |
| Gemini-flash-1.5  | Foreign Matters  | Foreign Matters  |
| Claude-3-haiku    | Vitreous Kernels | Vitreous Kernels |

What wheat variety is this?

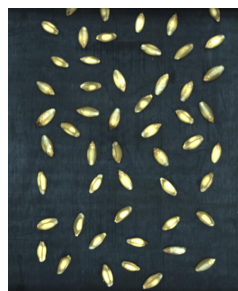

| Category           | Subcategory     | Task        |
|--------------------|-----------------|-------------|
| Identification (I) | Seed Morphology | Durum Wheat |

**Ground Truth:** Starchy Kernels

**Predictions:**

| Model Name        | 0 shot           | 8 shot           |
|-------------------|------------------|------------------|
| Gemini-pro-1.5    | Vitreous Kernels | Starchy Kernels  |
| GPT-4o            | Vitreous Kernels | Starchy Kernels  |
| LLaVA v1.6 34B    | Vitreous Kernels | Vitreous Kernels |
| Claude-3.5-sonnet | Vitreous Kernels | Starchy Kernels  |
| Gemini-flash-1.5  | Vitreous Kernels | Vitreous Kernels |
| Claude-3-haiku    | Vitreous Kernels | Vitreous Kernels |

What is the quality of the soybean seed?

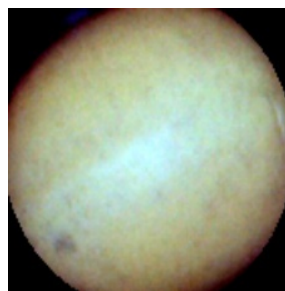

| Category           | Subcategory     | Task          |
|--------------------|-----------------|---------------|
| Identification (I) | Seed Morphology | Soybean Seeds |

**Ground Truth:** Intact

**Predictions:**

| Model Name        | 0 shot   | 8 shot  |
|-------------------|----------|---------|
| Gemini-pro-1.5    | Spotted  | Intact  |
| GPT-4o            | Spotted  | Intact  |
| LLaVA v1.6 34B    | Immature | Intact  |
| Claude-3.5-sonnet | Spotted  | Intact  |
| Gemini-flash-1.5  | Intact   | Spotted |
| Claude-3-haiku    | Intact   | Intact  |

What is the quality of the soybean seed?

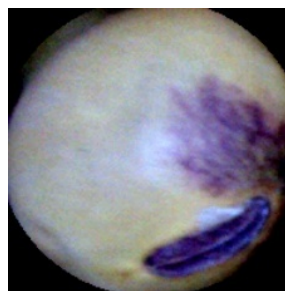

| Category           | Subcategory     | Task          |
|--------------------|-----------------|---------------|
| Identification (I) | Seed Morphology | Soybean Seeds |

**Ground Truth:** Spotted

**Predictions:**

| Model Name        | 0 shot       | 8 shot       |
|-------------------|--------------|--------------|
| Gemini-pro-1.5    | Skin-damaged | Spotted      |
| GPT-4o            | Skin-damaged | Skin-damaged |
| LLaVA v1.6 34B    | Skin-damaged | nan          |
| Claude-3.5-sonnet | Spotted      | Spotted      |
| Gemini-flash-1.5  | Skin-damaged | Spotted      |
| Claude-3-haiku    | Skin-damaged | Spotted      |

What mango leaf disease is present?

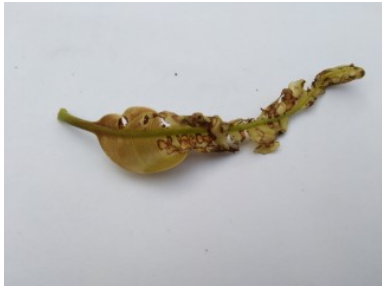

| Category           | Subcategory   | Task               |
|--------------------|---------------|--------------------|
| Identification (I) | Foliar Stress | Mango Leaf Disease |

Ground Truth: Anthracnose

Predictions:

| Model Name        | 0 shot         | 8 shot           |
|-------------------|----------------|------------------|
| Gemini-pro-1.5    | Cutting Weevil | Bacterial Canker |
| GPT-4o            | Cutting Weevil | Gall Midge       |
| LLaVA v1.6 34B    | Other          | Anthracnose      |
| Claude-3.5-sonnet | Cutting Weevil | Die Back         |
| Gemini-flash-1.5  | nan            | Anthracnose      |
| Claude-3-haiku    | Die Back       | Anthracnose      |

What mango leaf disease is present?

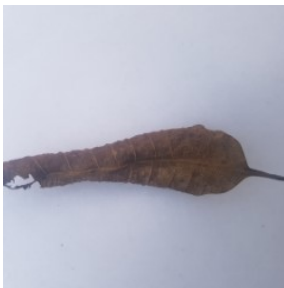

| Category           | Subcategory   | Task               |
|--------------------|---------------|--------------------|
| Identification (I) | Foliar Stress | Mango Leaf Disease |

Ground Truth: Die Back

Predictions:

| Model Name        | 0 shot   | 8 shot           |
|-------------------|----------|------------------|
| Gemini-pro-1.5    | nan      | nan              |
| GPT-4o            | Die Back | Die Back         |
| LLaVA v1.6 34B    | Die Back | Bacterial Canker |
| Claude-3.5-sonnet | Die Back | Die Back         |
| Gemini-flash-1.5  | nan      | nan              |
| Claude-3-haiku    | Die Back | Die Back         |

What type of bean leaf lesion is this?

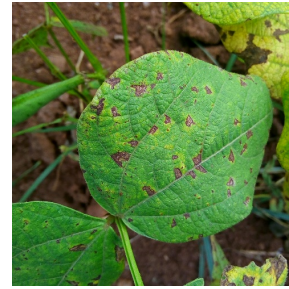

| Category           | Subcategory   | Task              |
|--------------------|---------------|-------------------|
| Identification (I) | Foliar Stress | Bean Leaf Lesions |

Ground Truth: Angular Leaf Spot

Predictions:

| Model Name        | 0 shot            | 8 shot            |
|-------------------|-------------------|-------------------|
| Gemini-pro-1.5    | Angular Leaf Spot | Bean Rust         |
| GPT-4o            | Angular Leaf Spot | Angular Leaf Spot |
| LLaVA v1.6 34B    | Bean Rust         | Angular Leaf Spot |
| Claude-3.5-sonnet | Angular Leaf Spot | Angular Leaf Spot |
| Gemini-flash-1.5  | Angular Leaf Spot | Angular Leaf Spot |
| Claude-3-haiku    | Angular Leaf Spot | Angular Leaf Spot |

What type of bean leaf lesion is this?

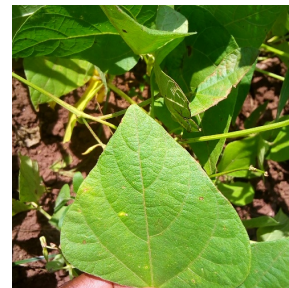

| Category           | Subcategory   | Task              |
|--------------------|---------------|-------------------|
| Identification (I) | Foliar Stress | Bean Leaf Lesions |

Ground Truth: Healthy

Predictions:

| Model Name        | 0 shot  | 8 shot            |
|-------------------|---------|-------------------|
| Gemini-pro-1.5    | Healthy | Healthy           |
| GPT-4o            | Healthy | Healthy           |
| LLaVA v1.6 34B    | Healthy | Angular Leaf Spot |
| Claude-3.5-sonnet | Healthy | Bean Rust         |
| Gemini-flash-1.5  | Healthy | Healthy           |
| Claude-3-haiku    | Healthy | Healthy           |

What is the type of stress in this soybean?

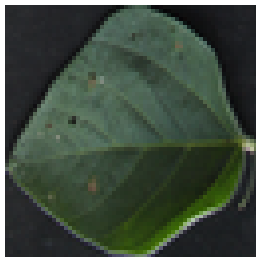

| Category           | Subcategory   | Task             |
|--------------------|---------------|------------------|
| Identification (I) | Foliar Stress | Soybean Diseases |

**Ground Truth:** Frogeye Leaf Spot

**Predictions:**

| Model Name        | 0 shot               | 8 shot                       |
|-------------------|----------------------|------------------------------|
| Gemini-pro-1.5    | Healthy              | Potassium Deficiency         |
| GPT-4o            | Bacterial Pustule    | Bacterial Blight             |
| LLaVA v1.6 34B    | Healthy              | Iron Deficiency<br>Chlorosis |
| Claude-3.5-sonnet | Healthy              | Healthy                      |
| Gemini-flash-1.5  | Healthy              | Healthy                      |
| Claude-3-haiku    | Potassium Deficiency | Potassium Deficiency         |

What is the type of stress in this soybean?

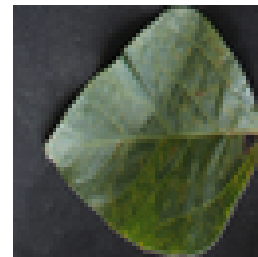

| Category           | Subcategory   | Task             |
|--------------------|---------------|------------------|
| Identification (I) | Foliar Stress | Soybean Diseases |

**Ground Truth:** Bacterial Pustule

**Predictions:**

| Model Name        | 0 shot                       | 8 shot                       |
|-------------------|------------------------------|------------------------------|
| Gemini-pro-1.5    | Herbicide Injury             | Iron Deficiency<br>Chlorosis |
| GPT-4o            | Healthy                      | Bacterial Pustule            |
| LLaVA v1.6 34B    | Healthy                      | Healthy                      |
| Claude-3.5-sonnet | Healthy                      | Healthy                      |
| Gemini-flash-1.5  | Iron Deficiency<br>Chlorosis | Healthy                      |
| Claude-3-haiku    | Frogeye Leaf Spot            | Sudden Death Syndrome        |



What is the name of this harmful insect?

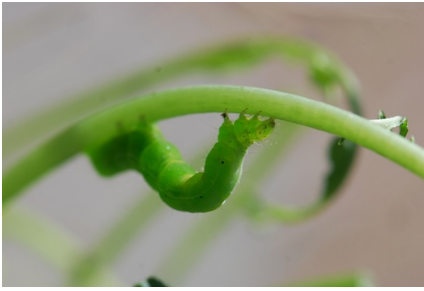

| Category           | Subcategory      | Task              |
|--------------------|------------------|-------------------|
| Identification (I) | Invasive Species | Dangerous Insects |

Ground Truth: Cabbage Loopers

Predictions:

| Model Name        | 0 shot          | 8 shot            |
|-------------------|-----------------|-------------------|
| Gemini-pro-1.5    | Cabbage Loopers | Cabbage Loopers   |
| GPT-4o            | Cabbage Loopers | Cabbage Loopers   |
| LLaVA v1.6 34B    | Cabbage Loopers | nan               |
| Claude-3.5-sonnet | Cabbage Loopers | Cabbage Loopers   |
| Gemini-flash-1.5  | Cabbage Loopers | Cabbage Loopers   |
| Claude-3-haiku    | Aphids          | Tomato Horn-worms |

What is the name of this harmful insect?

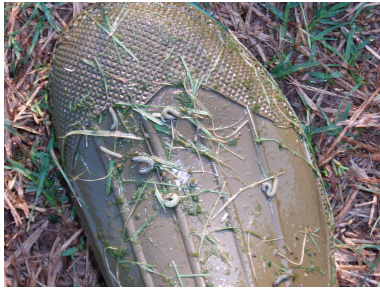

| Category           | Subcategory      | Task              |
|--------------------|------------------|-------------------|
| Identification (I) | Invasive Species | Dangerous Insects |

Ground Truth: Fall Armyworms

Predictions:

| Model Name        | 0 shot          | 8 shot    |
|-------------------|-----------------|-----------|
| Gemini-pro-1.5    | Armyworms       | Armyworms |
| GPT-4o            | Cabbage Loopers | Armyworms |
| LLaVA v1.6 34B    | Cabbage Loopers | nan       |
| Claude-3.5-sonnet | Armyworms       | Armyworms |
| Gemini-flash-1.5  | Fall Armyworms  | Armyworms |
| Claude-3-haiku    | Armyworms       | nan       |

What is the name of this weed?

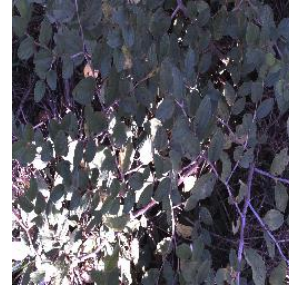

| Category           | Subcategory      | Task      |
|--------------------|------------------|-----------|
| Identification (I) | Invasive Species | DeepWeeds |

Ground Truth: Chinese apple

Predictions:

| Model Name        | 0 shot         | 8 shot        |
|-------------------|----------------|---------------|
| Gemini-pro-1.5    | Chinese apple  | Chinese apple |
| GPT-4o            | Chinese apple  | Chinese apple |
| LLaVA v1.6 34B    | Parthenium     | Parkinsonia   |
| Claude-3.5-sonnet | Lantana        | Lantana       |
| Gemini-flash-1.5  | Prickly acacia | Chinese apple |
| Claude-3-haiku    | Parthenium     | Parthenium    |

What is the name of this weed?

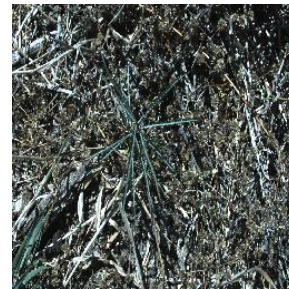

| Category           | Subcategory      | Task      |
|--------------------|------------------|-----------|
| Identification (I) | Invasive Species | DeepWeeds |

Ground Truth: Parkinsonia

Predictions:

| Model Name        | 0 shot     | 8 shot     |
|-------------------|------------|------------|
| Gemini-pro-1.5    | nan        | nan        |
| GPT-4o            | Parthenium | Negative   |
| LLaVA v1.6 34B    | nan        | Snake weed |
| Claude-3.5-sonnet | Snake weed | Parthenium |
| Gemini-flash-1.5  | nan        | Siam weed  |
| Claude-3-haiku    | Parthenium | Snake weed |



What is the severity of yellow rust disease?

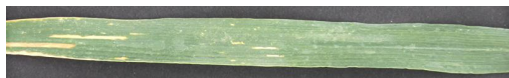

| Category           | Subcategory      | Task           |
|--------------------|------------------|----------------|
| Classification (C) | Disease Severity | Yellow Rust 19 |

Ground Truth: MRMS

Predictions:

| Model Name        | 0 shot                      | 8 shot                    |
|-------------------|-----------------------------|---------------------------|
| Gemini-pro-1.5    | Moderately Resistant (MR)   | Moderately Resistant (MR) |
| GPT-4o            | Moderately Susceptible (MS) | Moderately Resistant (MR) |
| LLaVA v1.6 34B    | Susceptible (S)             | No disease (0)            |
| Claude-3.5-sonnet | Moderately Resistant (MR)   | No disease (0)            |
| Gemini-flash-1.5  | Moderately Resistant (MR)   | MRMS                      |
| Claude-3-haiku    | Susceptible (S)             | Moderately Resistant (MR) |

What is the severity of yellow rust disease?

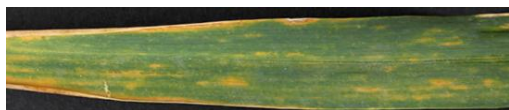

| Category           | Subcategory      | Task           |
|--------------------|------------------|----------------|
| Classification (C) | Disease Severity | Yellow Rust 19 |

Ground Truth: Resistant (R)

Predictions:

| Model Name        | 0 shot                      | 8 shot                      |
|-------------------|-----------------------------|-----------------------------|
| Gemini-pro-1.5    | Moderately Resistant (MR)   | Susceptible (S)             |
| GPT-4o            | Moderately Resistant (MR)   | Moderately Susceptible (MS) |
| LLaVA v1.6 34B    | Susceptible (S)             | Moderately Susceptible (MS) |
| Claude-3.5-sonnet | Moderately Susceptible (MS) | Moderately Susceptible (MS) |
| Gemini-flash-1.5  | Moderately Resistant (MR)   | Moderately Susceptible (MS) |
| Claude-3-haiku    | Moderately Susceptible (MS) | MRMS                        |

What is the rating (1-5) of soybean stress severity?

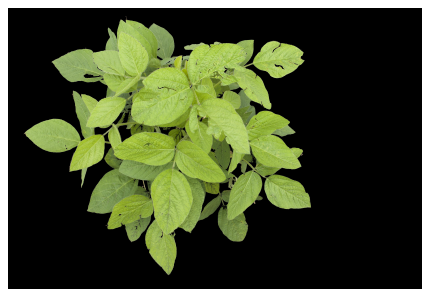

| Category           | Subcategory      | Task |
|--------------------|------------------|------|
| Classification (C) | Stress Tolerance | IDC  |

Ground Truth: 1

Predictions:

| Model Name        | 0 shot | 8 shot |
|-------------------|--------|--------|
| Gemini-pro-1.5    | 1.0    | 1.0    |
| GPT-4o            | 3      | 1      |
| LLaVA v1.6 34B    | 4.0    | nan    |
| Claude-3.5-sonnet | 2.0    | 2      |
| Gemini-flash-1.5  | 1      | 2      |
| Claude-3-haiku    | 1.0    | 3.0    |

What is the rating (1-5) of soybean stress severity?

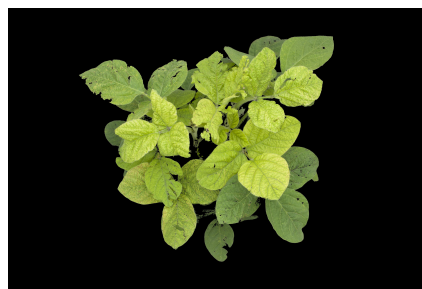

| Category           | Subcategory      | Task |
|--------------------|------------------|------|
| Classification (C) | Stress Tolerance | IDC  |

Ground Truth: 2

Predictions:

| Model Name        | 0 shot | 8 shot |
|-------------------|--------|--------|
| Gemini-pro-1.5    | 2.0    | 4.0    |
| GPT-4o            | 4      | 2      |
| LLaVA v1.6 34B    | 3.0    | nan    |
| Claude-3.5-sonnet | 3.0    | 3      |
| Gemini-flash-1.5  | 2      | 3      |
| Claude-3-haiku    | 1.0    | 3.0    |

What is the severity of chickpea fusarium wilt?

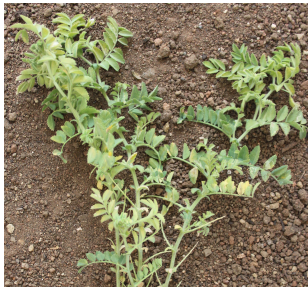

| Category           | Subcategory      | Task        |
|--------------------|------------------|-------------|
| Classification (C) | Stress Tolerance | FUSARIUM 22 |

Ground Truth: Resistant

Predictions:

| Model Name        | 0 shot               | 8 shot               |
|-------------------|----------------------|----------------------|
| Gemini-pro-1.5    | Susceptible          | Resistant            |
| GPT-4o            | Highly Susceptible   | Highly Resistant     |
| LLaVA v1.6 34B    | Highly Susceptible   | nan                  |
| Claude-3.5-sonnet | Susceptible          | Moderately Resistant |
| Gemini-flash-1.5  | Moderately Resistant | Moderately Resistant |
| Claude-3-haiku    | Resistant            | Resistant            |

What is the severity of chickpea fusarium wilt?

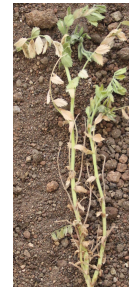

| Category           | Subcategory      | Task        |
|--------------------|------------------|-------------|
| Classification (C) | Stress Tolerance | FUSARIUM 22 |

Ground Truth: Susceptible

Predictions:

| Model Name        | 0 shot             | 8 shot               |
|-------------------|--------------------|----------------------|
| Gemini-pro-1.5    | Susceptible        | Susceptible          |
| GPT-4o            | Highly Susceptible | Highly Susceptible   |
| LLaVA v1.6 34B    | Resistant          | nan                  |
| Claude-3.5-sonnet | Susceptible        | Highly Susceptible   |
| Gemini-flash-1.5  | Highly Susceptible | Highly Susceptible   |
| Claude-3-haiku    | Susceptible        | Moderately Resistant |

What is the insect count?

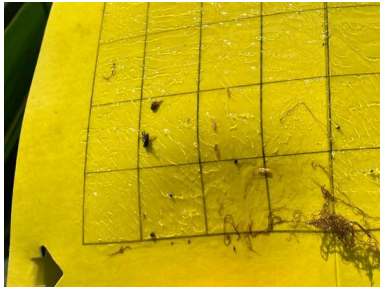

| Category           | Subcategory | Task        |
|--------------------|-------------|-------------|
| Quantification (Q) | Pest        | InsectCount |

Ground Truth: 2

Predictions:

| Model Name        | 0 shot | 8 shot |
|-------------------|--------|--------|
| Gemini-pro-1.5    | 10     | 5.0    |
| GPT-4o            | 6      | 9      |
| LLaVA v1.6 34B    | 7.0    | 4.0    |
| Claude-3.5-sonnet | 8      | 3      |
| Gemini-flash-1.5  | 4      | 6      |
| Claude-3-haiku    | 17.0   | 17.0   |

What is the insect count?

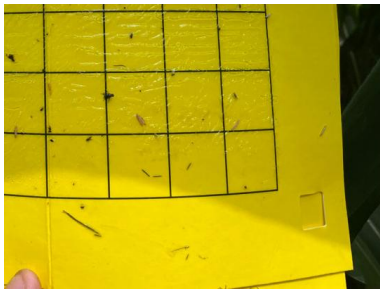

| Category           | Subcategory | Task        |
|--------------------|-------------|-------------|
| Quantification (Q) | Pest        | InsectCount |

Ground Truth: 1

Predictions:

| Model Name        | 0 shot | 8 shot |
|-------------------|--------|--------|
| Gemini-pro-1.5    | 8      | 8.0    |
| GPT-4o            | 9      | 2      |
| LLaVA v1.6 34B    | 0.0    | 11.0   |
| Claude-3.5-sonnet | 15     | 0      |
| Gemini-flash-1.5  | 1      | 2      |
| Claude-3-haiku    | 22.0   | 3.0    |

What is the diseased leaf percentage?

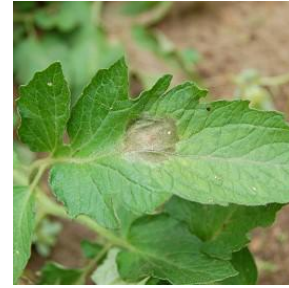

| Category           | Subcategory | Task     |
|--------------------|-------------|----------|
| Quantification (Q) | Disease     | PlantDoc |

Ground Truth: 3

Predictions:

| Model Name        | 0 shot | 8 shot |
|-------------------|--------|--------|
| Gemini-pro-1.5    | 10.0   | 3.0    |
| GPT-4o            | 7      | 8      |
| LLaVA v1.6 34B    | 5.0    | 7.0    |
| Claude-3.5-sonnet | 12     | 4      |
| Gemini-flash-1.5  | 5      | 4      |
| Claude-3-haiku    | 19.0   | 3.0    |

What is the diseased leaf percentage?

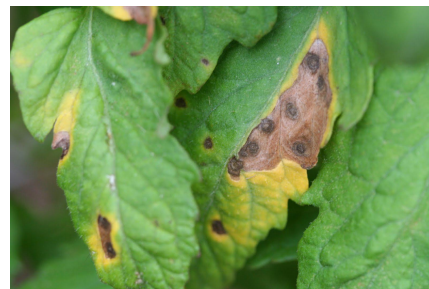

| Category           | Subcategory | Task     |
|--------------------|-------------|----------|
| Quantification (Q) | Disease     | PlantDoc |

Ground Truth: 12

Predictions:

| Model Name        | 0 shot | 8 shot |
|-------------------|--------|--------|
| Gemini-pro-1.5    | 10.0   | 5.0    |
| GPT-4o            | 18     | 12     |
| LLaVA v1.6 34B    | 10.0   | nan    |
| Claude-3.5-sonnet | 23     | 15     |
| Gemini-flash-1.5  | 32     | 12     |
| Claude-3-haiku    | 18.0   | 30.0   |
